# Supplementary material for: Sodium hexametaphosphate-treated halloysite based solid-phase extraction of biguanides from dietary supplements
Source: Royal Society of Chemistry journal article supplement (doi:10.1039/d3ay00400g), 2023-01-01
Supplement: d3ay00400g1.pdf [file d3ay00400g1.pdf]

## **Sodium hexametaphosphate-treated halloysite based solid-phase extraction of biguanides from dietary supplements**

Huanan Huang,<sup>a</sup> Yihui Chen,<sup>\*b</sup> Meilin Ni,<sup>b</sup> Jing Du,<sup>c</sup> Chunyan Hou,<sup>\*c</sup> Xiaoqiang Qiao,<sup>d</sup>

Guozhou Cao<sup>b</sup> and Tingting Wang<sup>\*a</sup>

<sup>a</sup> *School of Materials and Chemical Engineering, Ningbo University of Technology, 201 Fenghua Road, Ningbo 315211, P. R. China*

<sup>b</sup> *Ningbo Customs technology Center, 66 Qingyi Road, Ningbo 315040, P. R. China*

<sup>c</sup> *Department of Oncology, Lombardi Comprehensive Cancer Center, Georgetown University Medical Center, Washington, DC 20057, USA*

<sup>d</sup> *College of Pharmaceutical Sciences, Key Laboratory of Medicinal Chemistry and Molecular Diagnosis, Ministry of Education, Hebei University, Baoding 071002, P. R. China*

<sup>e</sup> *The Fifth Hospital of Shijiazhuang, Shijiazhuang 050021, P. R. China*

### **Correspondence**

Tingting Wang, School of Materials and Chemical Engineering, Ningbo University of Technology, 201 Fenghua Road, Ningbo 315211, P. R. China. E-mail: shiming-49@163.com.

Yihui Chen, Ningbo Customs technology Center, 66 Qingyi Road, Ningbo 315040, P. R. China. E-mail: lyly\_2001\_ren@163.com.

Chunyan Hou, Department of Oncology, Lombardi Comprehensive Cancer Center, Georgetown University Medical Center, Washington, DC 20057, USA. E-mail: ch1363@georgetown.edu.

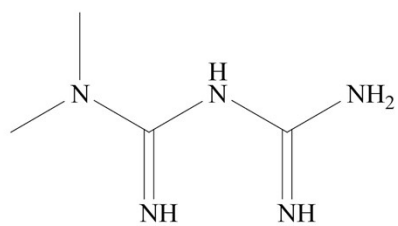

Metformin

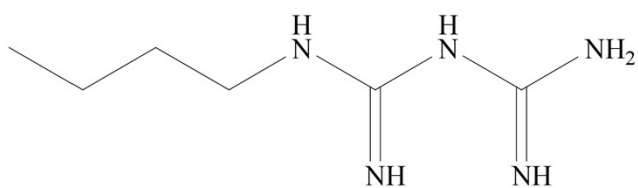

Buformin

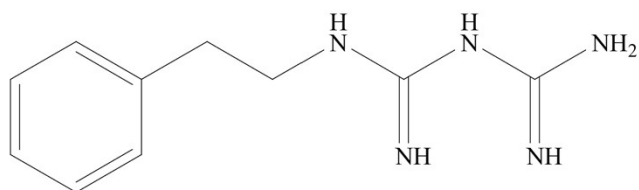

Phenformin

Fig. S1 Chemical structures of metformin, buformin, and phenformin.

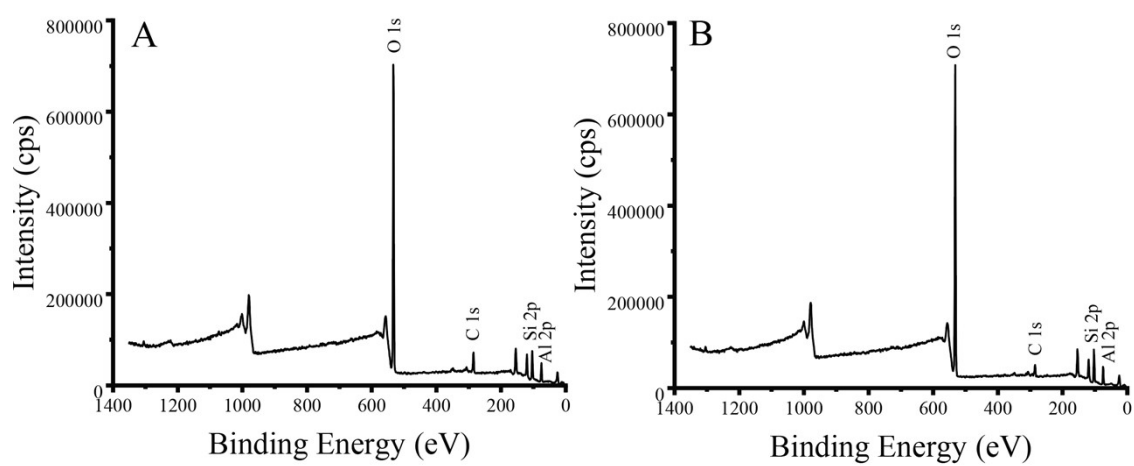

Fig. S2 XPS survey of the raw halloysite (A) and the purified halloysite (B).

Table S1 The  $pK_{a1}$ ,  $pK_{a2}$ , and  $\log P$  values of metformin, buformin, and phenformin.

| Compound   | $pK_{a1}$ <sup>a</sup> | $pK_{a2}$ <sup>b</sup> | $\log P$ <sup>b</sup> |
|------------|------------------------|------------------------|-----------------------|
| Metformin  | 2.95                   | 12.27                  | -1.43                 |
| Buformin   | 2.92                   | 12.27                  | -1.20                 |
| Phenformin | 2.86                   | 12.15                  | -0.64                 |

<sup>a</sup> Calculated using Advanced Chemistry Development (ACD/Labs) Software V6.0.

<sup>b</sup> From ref. 25.

Table S2 MRM parameters for metformin, buformin, and phenformin analyzed by

RPLC-MS/MS.

| Analyte    | Retention time<br>(min) | Precursor ion<br>( <i>m/z</i> ) | Product ions<br>( <i>m/z</i> ) | Declustering<br>potential<br>(V) | Collision<br>energy<br>(V) |
|------------|-------------------------|---------------------------------|--------------------------------|----------------------------------|----------------------------|
| Metformin  | 1.9                     | 130.3                           | 60.3*/71.4                     | 45                               | 19/31                      |
| Buformin   | 3.7                     | 158.3                           | 60.1*/116.                     | 55                               | 23/22                      |
| Phenformin | 4.9                     | 206.0                           | 60.2*/105.0                    | 80                               | 31/36                      |

\* Quantitation ion.

Table S3 XPS atomic content (at.%) for the raw halloysite and the purified halloysite.

| Material            | Surface concentration (at. %) |       |       |       |
|---------------------|-------------------------------|-------|-------|-------|
|                     | Al                            | Si    | O     | C     |
| Raw halloysite      | 13.17                         | 14.41 | 61.86 | 10.56 |
| Purified halloysite | 14.04                         | 15.43 | 63.74 | 6.79  |
